# Supplementary material for: Satellitome Analysis on Talpa aquitania Genome and Inferences about the satDNAs Evolution on Some Talpidae
Source: MDPI journal article supplement (doi:10.3390/genes14010117), 2022-12-31
Supplement: s1 [file s1]

## Supplementary Figures

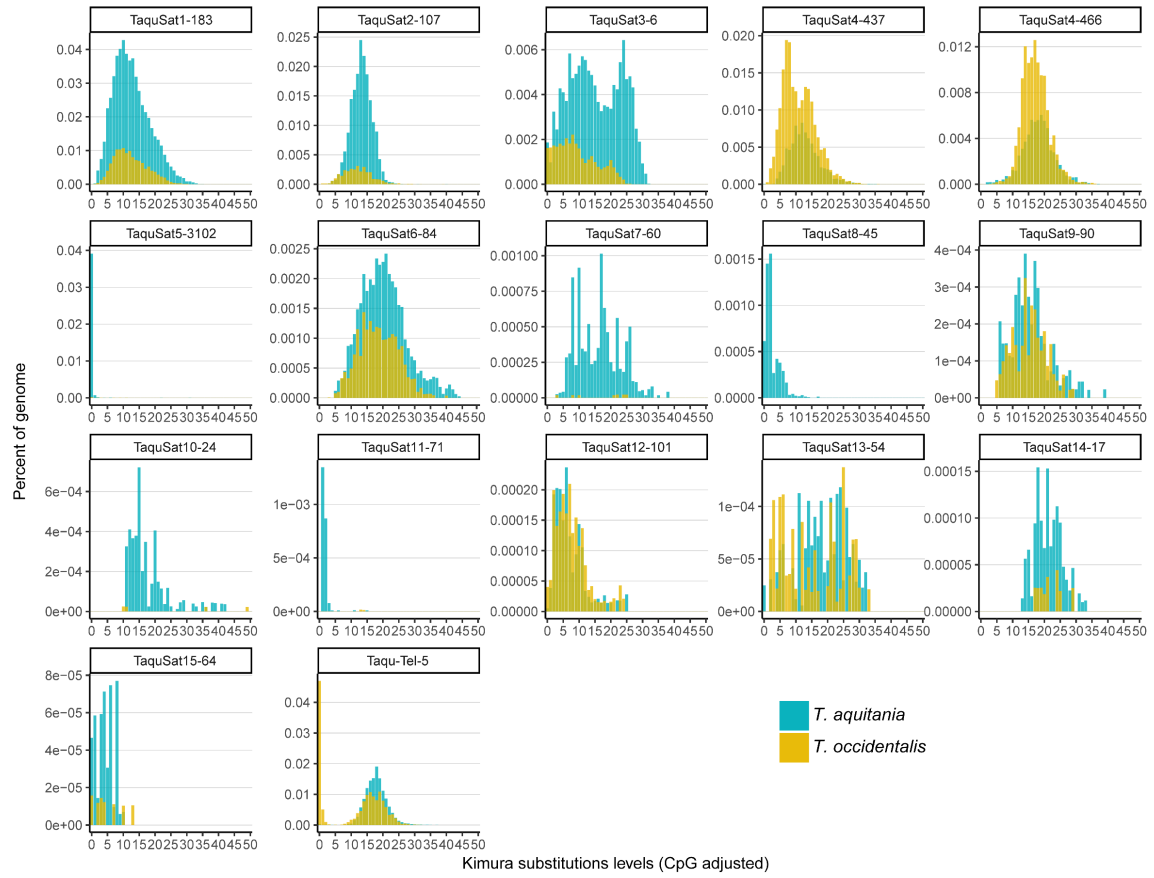

**Figure S1.** Satellitome landscapes (abundance versus divergence) of *Talpa aquitania* satDNA families on *Talpa aquitania* and *Talpa occidentalis* genomes.

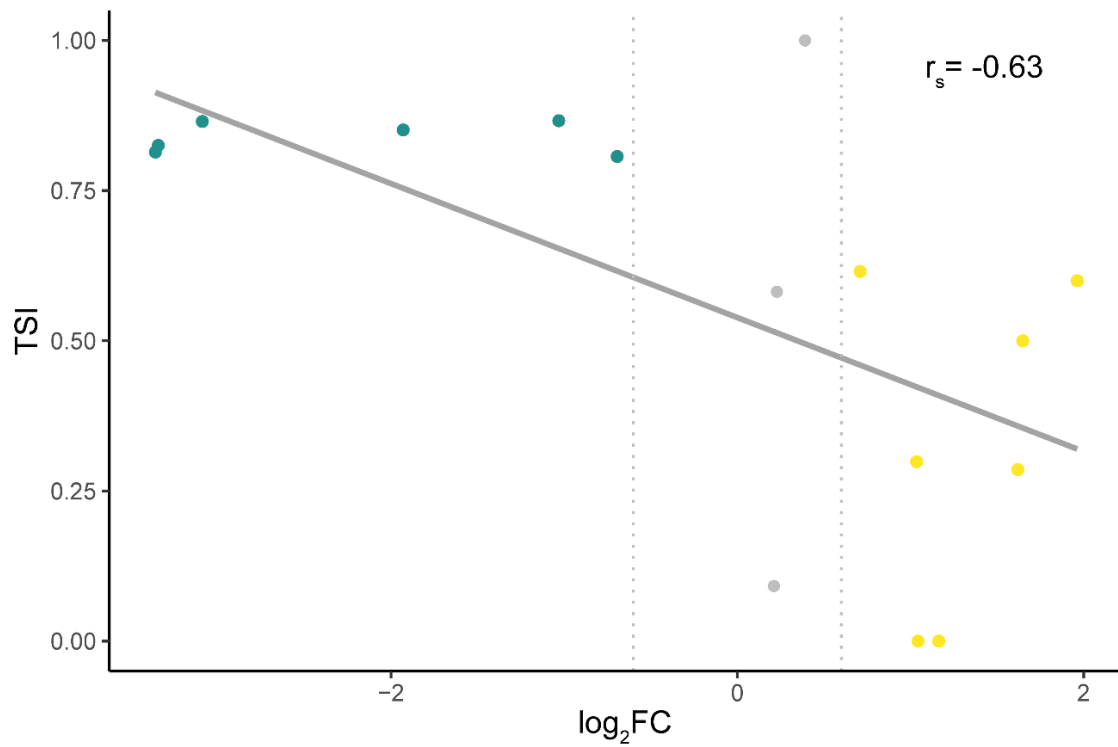

**Figure S2.** Correlation between the tandem structure index and the fold-change of satDNA family abundance among *Talpa occidentalis* assembled genome and *T. occidentalis* genome. The fold-change is expressed as log<sub>2</sub> of genome percentage among samples. SatDNA families with less of 1.5 fold-change between samples ( $-0.6 < \log_2 \text{ratio} < 0.6$ ) are in grey, most abundant satDNA families on *T. occidentalis* assembly in yellow and most abundant on *T. occidentalis* unassembled reads in blue. Regression line is depicted in dark grey.

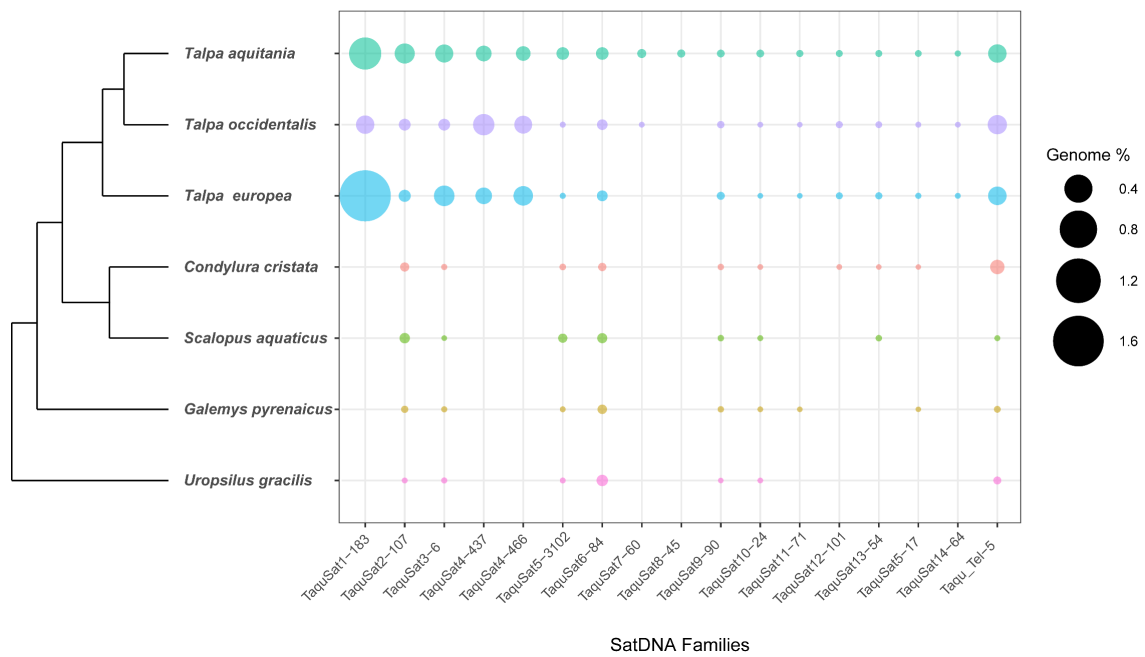

**Figure S3:** Presence and abundance of *Talpa aquitania* satDNA families across species of the family Talpaidea. The bubble size indicates the abundance of satDNA family.
