# Supplementary material for: Satellitome Analysis on Talpa aquitania Genome and Inferences about the satDNAs Evolution on Some Talpidae
Source: MDPI journal article supplement (doi:10.3390/genes14010117), 2022-12-31
Supplement: s1 [file s1]

Table S1: *T. aquitania* satDNA families consensus sequences

| satDNA name      | consensus sequence                                                                                                                                                                                                                                                                                                                                                                                                                                                                                                                                                                                                                                                                                                                                                                                                                                                                                                                                                                                                                                                                                                                                                                                                                                                                                                                                                                                                                                                                                                                                                                                                                                                                                                                                                                                                                                                                                                                                                                                                                                                                                                                                                                                                                                                                                                                                                                                                                                                                                                                                                                                                                                                                       |
|------------------|------------------------------------------------------------------------------------------------------------------------------------------------------------------------------------------------------------------------------------------------------------------------------------------------------------------------------------------------------------------------------------------------------------------------------------------------------------------------------------------------------------------------------------------------------------------------------------------------------------------------------------------------------------------------------------------------------------------------------------------------------------------------------------------------------------------------------------------------------------------------------------------------------------------------------------------------------------------------------------------------------------------------------------------------------------------------------------------------------------------------------------------------------------------------------------------------------------------------------------------------------------------------------------------------------------------------------------------------------------------------------------------------------------------------------------------------------------------------------------------------------------------------------------------------------------------------------------------------------------------------------------------------------------------------------------------------------------------------------------------------------------------------------------------------------------------------------------------------------------------------------------------------------------------------------------------------------------------------------------------------------------------------------------------------------------------------------------------------------------------------------------------------------------------------------------------------------------------------------------------------------------------------------------------------------------------------------------------------------------------------------------------------------------------------------------------------------------------------------------------------------------------------------------------------------------------------------------------------------------------------------------------------------------------------------------------|
| TaquSat1-183     | GAGATGTAGAACTACAAGAACAACAAGAAGCTAGAAGAACAAGAACAAGAAGAACAAGAAACAGAAGAATAAGTCAAAAA<br>GCAGAAATAACAGAAGAATAAGCTGAGGAAGAAGCAGAAAAAGAAGTAATTGAAAAAGCAGAAAATGCAGAAGAAACAGAAGA<br>AGATGAAGAAGAAGAAG                                                                                                                                                                                                                                                                                                                                                                                                                                                                                                                                                                                                                                                                                                                                                                                                                                                                                                                                                                                                                                                                                                                                                                                                                                                                                                                                                                                                                                                                                                                                                                                                                                                                                                                                                                                                                                                                                                                                                                                                                                                                                                                                                                                                                                                                                                                                                                                                                                                                                             |
| TaquSat2-107     | TTTCTCCTCAGAGGCCTGTCTTCTCCTCAGAATCTGCTTCCCAGGGTGTCAATTTCTCCTCAGATATTTCTCCTCAACACTCCT<br>TACTACAGTATTTCTCCTCAGTTT                                                                                                                                                                                                                                                                                                                                                                                                                                                                                                                                                                                                                                                                                                                                                                                                                                                                                                                                                                                                                                                                                                                                                                                                                                                                                                                                                                                                                                                                                                                                                                                                                                                                                                                                                                                                                                                                                                                                                                                                                                                                                                                                                                                                                                                                                                                                                                                                                                                                                                                                                                         |
| TaquSat3-6       | CTTCTT                                                                                                                                                                                                                                                                                                                                                                                                                                                                                                                                                                                                                                                                                                                                                                                                                                                                                                                                                                                                                                                                                                                                                                                                                                                                                                                                                                                                                                                                                                                                                                                                                                                                                                                                                                                                                                                                                                                                                                                                                                                                                                                                                                                                                                                                                                                                                                                                                                                                                                                                                                                                                                                                                   |
| TaquSat4-437-470 | Consensus pattern 437 bp<br>GGTGTCCCCGAGGGGAAGATTACC GTTCCCCCAAGGGGGAAGAGGGTCGCGTTTCCCCCTGGGGTAGAGGGTCCCCTACCC<br>CCGTGGGGGCTGAGGGTCCCCATCCCCCTCGCGCGCGCCCCCTCGCGGCGGCTCTGTGAAGTGCACCTGTGCTCAGGGAGAGT<br>CCGGTGGGCGGGGTGAGGCTCCGGCCGGGGCGGAGCCTGGGGCTCATCAGCGCTGCCTGGCCAGGTGAGGACTCTTCCCCCTT<br>TGAGTGGTGCTGGGTTGCTCGGGCCTTTCCCCGCCGGCCTGTCTTCCTGCAGTTTGGAGGAGGCCGCGGTGCGCGTCTGTCT<br>GTGGCTTGCAGGGGTGCCCCCTGACGGTGACCCGCCCCCTTCGTCTATGGCGCTCTGGGCGCAATGTCCGCCCCTCGGGT<br>TGTGAGTGCGGAGGAGGTTGCA<br>Consensus pattern 466 bp<br>GGCTTCCCCCAAGGGGAAGATAGCCCCGTCCCCCATGGGGGAGGAAAAATCCCGTTCCCCCATGGGTGCAGAGGTCCCCAAA<br>CCCCATGAAGGCTGAGGTCCCCGAACCCCTCACCAGCGCCCCCTAGCGGCAGCCCTGAGAAGTGCACCTTCGAGCATGCAGA<br>GTCCAGTGGGCGGGGTGAGGCTACGGCCAGGGGCGGAGCCTGGGGCTCATCAGCGCTGCGGGCCAGGTGAGGACTCTTACCCT<br>TTCAGTGGGGCTGGCTTGCCCCGGGCTTTCGCGCCACCCTGTCTGCCTGCAGTTTGGGAAGAGGCTCAGGTCGCCGCTGTGC<br>CCTGGCGTACAGGGGTGCCCTCCCCGGACAGGGACCCACCCCTCCGTCTAGGGCGCCTGAGGGCGCATCGGCATGCCCTA<br>GGGCTGTGAGTGCAGAGGAGGGTGCAGGTGTTCCCCGGGGGAAAGATTG                                                                                                                                                                                                                                                                                                                                                                                                                                                                                                                                                                                                                                                                                                                                                                                                                                                                                                                                                                                                                                                                                                                                                                                                                                                                                                                                                                                                                                                                                                                                                                                                                                                           |
| TaquSat5-3102    | TGATCATAGATGGGGAAATACCAATCCACATCAACAAGAAGAGGGGGTTCCTCTTCCTGAGGACACAAGTGGATTATTCCACC<br>TTTCAGGCTCTACATGAAGTGCCTTCCATAGGAGAGCTGGCGTAATATAAATATTTATGAAAAGAAATGCACTAAAAC TAAGA<br>TGAAAGTGGGCGCAGACCCAGAGAGCCACAGGGTGGGGGTACCTAGAAGTCAGTGACCTGGCACCCCTTTGAAACAACCATT<br>TGCTTAACAGGACTTGGGATTTGCCAGACAAGATATCGATTGCACAGAAGCAAGAAGGACTTGGTTTGGTTTGGAGGCAGGA<br>ATGAAGCATGACAATGAGCATCACATTGTGCTCCTTACCTCTCCCTGGAGGGTTCGCTCCAGGTTCTGCAGCGGCTGCTT<br>TCTCCTCCACATTTTCCACGATCTCTAATCTTGAAGATAGAACAACATGGTCATCCATACAAATGACCAAACCAAGTGCTTTA<br>CTAGACCTGAAACTGTAGTTGAGGACCTCAACTCCACCCTGAAGCAGAATCACCACAGCCTGCTACCTGCTTGGCTAGTGGGC<br>GGCTTCCTGCGCTGCTCCTGCATCTCCACTCCATCTGACACGCCAGGACCTGTGGGGAAACACAGCCACTGGTCAGGCCCAG<br>TACAGTGCAGAGAAGGGGGGAAGGAGAGTCAACTTACCATTCTCCTGAGCCTTCCTTCCAGCCTGATCCACCGAAACTGAT<br>CCTTGGAGCCTGAGCCTTTGAGCCTTCAAGCCCTGGAGCCTTCTTCTCCTGCTGGGCAATCTGAAAAGAGCAACACAGCCAAG<br>CCCTGGGGTTAGGTCCCTGGGGCTTTGCAAACATTTGTTTGAGGAGCAGGAGGATTGCTGTGGGGAGAGGCAGGTTACCTGG<br>AGTTGATGAACAAAGTCAGCTTGCCCTCAGTTTCTGCAAGTTTCTTCAAGTTTCTTGCCTATTATGTTGATTTCATTAGAGAA<br>AGCAGAATATTAAGAATCATTTAAAGTCATTTCCCAAGTGCCTATTACCTTCACATCTATTGTTCCCTAATACAAC TGACCTA<br>TACACAGAAAACAATTTTTCAGGTTATAAACACACTGTGGGGTCAAAGCTTTTGTATGCATCATTTCTTATTTACTGTTTG<br>ATGCCACCAGATTCTCAGCCTGTGTAACTTACTTACCATCTCAACATTTTCGCTAATTGATCATGTCTCAATAGCTTGTCT<br>CATAAAGCTCTAATCTCCTTTGATTTATATCCCTATCATATTTGCCAGAATTCGAAAGTCTAGGTCCATCAATGACAAAAG<br>CATATTTACGGATATGATTACCCCTACAGTGAGCTAGTTTGTTCGTGATTATAAAAATTACACTGTCTCAGAGACATTTGTA<br>TGAACTAAAAGGCTAAGAGCATTGGGGGATCAAGAAATATTTATGAACTATTTTTTGTGTTCTTTGTAGAACAAC TTTTGT<br>TCCTTGTTGTGCTCTATATGACTTCTGAAACTTTGCTGATATCACTAAACATCCTGAGTCTAAACATTACAAGTTTAAAA<br>ACAAAAGCCGGGATTTCTTGACCTGCTGGTATCTACGAACTCACTTGTATTTTTCAATTTCTTGAAGAATTTCTTTTCAAGTTT<br>CATCTCCAGAGCTACAAGCTCCTTCTCCTTTTTCTCCCTTTTCATGCTGTTTCCATTTTCAGCATCCTGAATTGGGAAAGACAGA<br>GATGATGCCCAGCACCCCTCACGAAATCCTGCCTTTCCAGCTCAGGGCCTGGATTGCAAAGCCCCCTCCTGCGCTGCGCTCT<br>GCTGTGCCCTCTGCAAAC TCGGCTTTTCTCAGAGTCTCCACCAGCTCATTGCTCTTCAGTCATCAGGACAAGGGCGTGGGGT<br>GCCTCCCTGTGCTGGGGCTGCTGTTTGAGAAGGTGAAGGCTTTTCTTTCAAAC TGGAAACGTACACGTGAAATTTCCACCTT<br>GAAATAAAGGGGATGCCTGTCCAAC TACGACAACCACATACATTAGGGCAAAGAAGGGGATCCTACCAGTCCGCATCTCCGA<br>GGGGAGCCTGATTATCAAGCCCAGGCTGTGCTTATGCAGGACAAGTAGCTATGAAGACAGTCTTACAGGCTGGGACTTCCCGA<br>GCCCTCTGCCATCAGCCCCACATAGTCTGAAGGCTCGGGAGCAGAGCTTTGCCTCCTACTGCAAACCTCGTGGGAGAAAAG<br>GTCCATCTTATCGCTGCTAGGATGTACTGAAATATAAAATGCTGGAACTGTCCCTTAGTCAGGGTATTATCTCTAGGAAGCA<br>ATTTCAAATGGACAACAAACAGCTTCAGGGCGTCAATTTCTTTACCAAGACCCAGATCACAGCTAGTGTGGGCAGCAATGAG<br>CTGTGGCTGGGAATCCTTCTTTGCTCTGCCGCCCTCAGACTATTTTCTCATGCTGCTGACTCCAAGCTGACACTCTATTAA |

|                      |                                                                                                                                                                                                                                                                                                                                                                                                                                                                                                                                                                                                                                                             |
|----------------------|-------------------------------------------------------------------------------------------------------------------------------------------------------------------------------------------------------------------------------------------------------------------------------------------------------------------------------------------------------------------------------------------------------------------------------------------------------------------------------------------------------------------------------------------------------------------------------------------------------------------------------------------------------------|
|                      | CTGTATAGATTGACACACAAAATAATAAGGAACCGGGACAAAGTAAGCACTGAAGAGAGAAGAGGACACACACTTCTTTCTAG<br>CCTCCCTACTGTTCTCGCAGCAACCGCTTCCTATAGTGACTGCAGTACTTATGGCTTTGCTGTTTACATGCCCACATTACATG<br>CCCACAGAAAAAGATCACAGAGGAAGGAAAGCTGGTGGGGACATCATCCCCCTACCCCTTCTCTGCGTCCTCAGCTGGCACAGA<br>GTTGCCATCACTCACGGGAGCTGCACCAGGTCTGAGTCTGACAAAGACCACAGAAGTGACAGAGGTGATTGGGACTTGACAG<br>AGATGGTGAGGAAACCCTCCTTGCCTTCCCCATTACCTCCATTGTCCCCACATTAGTCCCTTCTCAGGATATGGGGCTCT<br>CCAGGAGCCTCACTGGCCCCAGAGCCCAAGGGGGACAGGAATCACCCAGTCCCCTGGGTGACACGCTTCTCTCAACTTCAT<br>CACCCAAGTGGGAACCTGTCAGGGCTCACCTAGTTGGAGTCTGGCACAAAAACAGAGGCTCCCCAATGCTTGGCAAGACAAAT<br>TGCCATTTCAATGTAGGTTAAAGAAAAAGTA |
| <b>TaquSat6-84</b>   | GAAACCYTAYRAATGTGAAGARTGTGGGAAAGCYTTTWMCCRKAAGTCAHMCCTCACTRAACATCAGAGAATTCACTGAG<br>A                                                                                                                                                                                                                                                                                                                                                                                                                                                                                                                                                                       |
| <b>TaquSat7-60</b>   | GATCTGTCAGCAGCTAGGTATGCCTTGCGATCACAAGCCTCAACTAGTGGTACCTGGGTT                                                                                                                                                                                                                                                                                                                                                                                                                                                                                                                                                                                                |
| <b>TaquSat8-45</b>   | GGCTGAAGACCATCCACCAGTCTCATCAACATCTCGAGACGTAAA                                                                                                                                                                                                                                                                                                                                                                                                                                                                                                                                                                                                               |
| <b>TaquSat9-90</b>   | GAACCAAGTACAGAGGANAGGAGACAAATGATAGCACAGGGTGGAGGCTCAGATGAAGANAGGGAATACAGACAGRSTAGAAG<br>GAATCTA                                                                                                                                                                                                                                                                                                                                                                                                                                                                                                                                                              |
| <b>TaquSat10-24</b>  | GAGCCTTGATCATGGTCACAGACT                                                                                                                                                                                                                                                                                                                                                                                                                                                                                                                                                                                                                                    |
| <b>TaquSat11-71</b>  | TCAGCCTACCCCCAAGGGGTCTACAGCCACTCACAGTTTAACAGGCAGTGCCTCAGCGCCTGCCACTGAAG                                                                                                                                                                                                                                                                                                                                                                                                                                                                                                                                                                                     |
| <b>TaquSat12-101</b> | CGGAGGAAAACCACTGAATGACAGGACTTGGTGTTGAGAGCCTGGAAAGTGACCTGCGTGAGTCGGGCTTCTACATCTCCAC<br>AGTCTGAGAATAACAAAA                                                                                                                                                                                                                                                                                                                                                                                                                                                                                                                                                    |
| <b>TaquSat13-54</b>  | CATGCAGGATCAAGTGCAACGACAAAAATCAGACTTTTGAGTCAGCTTTTCAAAG                                                                                                                                                                                                                                                                                                                                                                                                                                                                                                                                                                                                     |
| <b>TaquSat14-17</b>  | GACCCCGAGAACCCAGT                                                                                                                                                                                                                                                                                                                                                                                                                                                                                                                                                                                                                                           |
| <b>TaquSat15-64</b>  | AGCCTGCCGCAGAGCAGGCTGGGAAGGATGAGACCAAGCAATAGAATAAAGAGGGCTGCCTTCA                                                                                                                                                                                                                                                                                                                                                                                                                                                                                                                                                                                            |

**Table S2:** List of oligos used to localize by FISH the repeat DNA sequences of *Talpa aquitania*

| Oligo              | Sequentia (5' a 3')            |
|--------------------|--------------------------------|
| TaquSat1-183-F     | AATAAGTCAAAAAAGCAGAAATAACAGAAG |
| TaquSat1-183-R     | TTGTTCTTCTAGTTCTTGTTGTTGTTC    |
| TaquSat2-107       | TCWCCTCAGATWTTTCTCCTC          |
| TaquSat3-6         | TTCTTCTTCTTCTTCTTCTTCTTCTTCTTC |
| TaquSat4-437-466-F | TGCCTGCAGTTTTGGAGG             |
| TaquSat4-437-466-R | GACTCTGCCTGCGCACAG             |
| TaquSat5-3102-F1   | CACATCAACAAGAAGAGGGGGTTC       |
| TaquSat5-3102-R1   | TGAGTTCGTAGATACCAGCAGGTC       |
| TaquSat5-3102-F2   | AGCATCCTGAATTGGGAAAGACAG       |
| TaquSat5-3102-R2   | GAGCCTCTGTTTTTGTGCCAGAC        |
| TaquSat6-84-F      | CATCAGAGAATTCAYACTGGAG         |
| TaquSat6-84-R      | AAARGCTTTCCCACAYTCTTCAC        |
| TaquSat7-60        | CGATCACAAGCCTCAACTAGTGGTACCTG  |
| TaquSat8-45        | AGACCATCCACCAGTCTCATCAACATCTC  |
| TaquSat9-90-F      | CAGATGAAGANAGGGAATACAGAC       |
| TaquSat9-90-R      | CACCCTGTGCTATCATTTGTCTC        |
| TaquSat10-24       | AGTCTGTGACCATGATCAAGGCTC       |
| TaquSat11-71-F     | CCTCAGCGCCTGCCACTGAAG          |
| TaquSat11-71-R     | GTGAGTGGCTGTAGACCCCTTG         |
| TaquSat12-101-F    | GGAAAACCACTGAATGACAGGAC        |
| TaquSat12-101-R    | GTTATTCTCAGACTGTGGAGATGTAG     |
| TaquSat13-54       | GCAGGATCAAGTGCAACGACAAAATCAGAC |
| TaquSat14-17       | CAGAACCCCAAGTGACCCCAAGAAC      |
| TaquSat15-64       | GGCTGGGAAGGATGAGACCAAGCAATAG   |
