# Supplementary material for: Satellitome Analysis on Talpa aquitania Genome and Inferences about the satDNAs Evolution on Some Talpidae
Source: Genes (Basel). 2022 Dec 31;14(1):117. doi: 10.3390/genes14010117 (PMC9859602; doi:10.3390/genes14010117)
Supplement: Supplementary file 1 [file genes-14-00117-s001.zip › Supplementary Table S3.xlsx]

## Sheet: T.occidentalis
SatDNA Family	RUL	A-T%	Genome %	Kimura Divergence %	TSI	DivPeak	RSP	log2(T. occidentalis/T. aquitania Genome %)
TaquSat1-183	183	67.2	0.131054	12.77	0.81414	10	0.391301	-2.09176
TaquSat2-107	107	55.1	0.0312906	12.41	0.866306	12	0.427928	0.176273
TaquSat3-6	6	66.7	0.0310583	9.62	0.825213	8	0.305795	-2.00461
TaquSat4-437	437	30.4	0.198053	11.34	0.850987	7	0.392603	1.26704
TaquSat4-470	466	32.6	0.120195	17.67	0.806816	17	0.455254	0.865162
TaquSat5-3102	3102	53	0.000252841	3.13	1	0	0.619634	-7.30661
TaquSat6-84	84	65.5	0.0206522	19.12	0.581665	14	0.279278	-0.953524
TaquSat7-60	60	48.3	0.000144087	17.32	0.285714	22	0.449097	-6.10629
TaquSat9-90	90	56.7	0.00293611	15.75	0.615385	14	0.312186	-0.532063
TaquSat10-24	24	50	9.29672e-05	26.36	0.5	10	0.522964	-5.48896
TaquSat11-71	71	40.3	2.88173e-05	13.71	0	13	1	-6.33676
TaquSat12-101	101	50.5	0.0020102	8.08	0.0916667	7	0.421374	0.159138
TaquSat13-54	54	59.3	0.0014128	15.5	0.298701	25	0.143694	-0.311042
TaquSat14-17	17	35.3	0.000223021	22.17	0.6	24	0.297277	-2.52934
TaquSat15-64	64	45.3	8.62014e-05	5.39	0	0	0.319838	-2.39902
Taqu_Tel-5	6	50	0.148705	11.44	0.865046	0	0.356608	-2.42261
Total	16		0.688196
Media	304.5	50.3875	0.0430122	13.8613	0.562602	11.4375	0.418427	-2.25094
Mediana	77.5	50.25	0.00247315	13.24	0.607692	11	0.391952	-2.04818
SD	758.678	11.5508	0.066204	5.99724	0.332633	7.94958	0.189819	2.70807
Min	6	30.4	2.88173e-05	3.13	0	0	0.143694	-7.30661
Max	3102	67.2	0.198053	26.36	1	25	1	1.26704

## Sheet: T. occidentalis assembly
SatDNA Family	RUL	A-T%	Genome %	Kimura Divergence %	DivPeak	RSP	log2(T. occidentalis assembly/T. occidentalis Genome %)
TaquSat1-183	183	67.2	0.0127558	11.14	12	0.430126	-3.36094
TaquSat2-107	107	55.1	0.0153097	11.09	12	0.458858	-1.03129
TaquSat3-6	6	66.7	0.00305826	13.98	22	0.311766	-3.34419
TaquSat4-437	437	30.4	0.0519786	12.81	11	0.71043	-1.9299
TaquSat4-470	466	32.6	0.0742894	19.26	18	0.700362	-0.694149
TaquSat5-3102	3102	53	0.000331598	7.08	0	0.455042	0.391205
TaquSat6-84	84	65.5	0.024196	24.35	24	0.247907	0.22847
TaquSat7-60	60	48.3	0.000442846	25.33	17	0.242566	1.61986
TaquSat8-45	45	51.1	2.58339e-05	4.46	6	0.661856
TaquSat9-90	90	56.7	0.00479986	19.51	13	0.305777	0.709086
TaquSat10-24	24	50	0.00029137	38.96	43	0.297704	1.64806
TaquSat11-71	71	40.3	6.4537e-05	13.01	1	0.320075	1.16319
TaquSat12-101	101	50.5	0.00232686	8.57	3	0.323353	0.211048
TaquSat13-54	54	59.3	0.0028954	20.45	22	0.321022	1.0352
TaquSat14-17	17	35.3	0.0008692	22.06	21	0.513168	1.96251
TaquSat15-64	64	45.3	0.000177644	6.19	6	0.543852	1.04321
Taqu_Tel-5	6	50	0.0174654	5.32	0	0.738591	-3.08988
Total	17		0.211278
Media	289.235	50.4294	0.0124281	15.5041	13.5882	0.446027	-0.214907
Mediana	71	50.5	0.0028954	13.01	12	0.430126	0.309837
SD	737.278	11.1853	0.0208114	9.04293	11.0909	0.171068	1.82601
Min	6	30.4	2.58339e-05	4.46	0	0.242566	-3.36094
Max	3102	67.2	0.0742894	38.96	43	0.738591	1.96251

## Sheet: T. europea
SatDNA Family	RUL	A-T%	Genome %	Kimura Divergence %	TSI	DivPeak	RSP
TaquSat1-183	183	67.2	1.63558	15.18	0.892635	13	0.400805
TaquSat2-107	107	55.1	0.0343657	13.7	0.858784	15	0.484947
TaquSat3-6	6	66.7	0.178621	8.85	0.766667	0	0.297017
TaquSat4-437	437	30.4	0.0967441	15.27	0.832901	13	0.458964
TaquSat4-470	466	32.6	0.153772	18.77	0.881747	18	0.53224
TaquSat5-3102	3102	53	0.000358195	4.89	0.75	0	0.403703
TaquSat6-84	84	65.5	0.0224519	22.1	0.503299	24	0.278421
TaquSat9-90	90	56.7	0.00518514	15.55	0.45	15	0.394345
TaquSat10-24	24	50	4.70307e-05	34.55	0	35	0.778181
TaquSat11-71	71	40.3	3.54387e-05	8.59	0	5	0.345794
TaquSat12-101	101	50.5	0.00187013	8.98	0	2	0.303758
TaquSat13-54	54	59.3	0.00226377	18.52	0.170213	13	0.298509
TaquSat14-17	17	35.3	0.000408538	23.77	0.208333	26	0.382806
TaquSat15-64	64	45.3	0.00015699	7.22	0	4	0.633474
Taqu_Tel-5	6	50	0.133344	18.88	0.6801	0	0.137776
Total	15		2.26521
Media	320.8	50.5267	0.151014	15.6547	0.466312	12.2	0.408716
Mediana	84	50.5	0.00518514	15.27	0.503299	13	0.394345
SD	782.401	11.9423	0.415543	7.6753	0.366918	10.5911	0.156197
Min	6	30.4	3.54387e-05	4.89	0	0	0.137776
Max	3102	67.2	1.63558	34.55	0.892635	35	0.778181

## Sheet: C. cristata
SatDNA Family	RUL	A-T%	Genome %	Kimura Divergence %	TSI	DivPeak	RSP
TaquSat2-107	107	55.1	0.0107082	29.32	0.185639	31	0.382263
TaquSat3-6	6	66.7	0.000407742	3.27	0.666667	2	0.76017
TaquSat5-3102	3102	53	0.00111034	23.15	0.392857	24	0.398518
TaquSat6-84	84	65.5	0.00633522	21.02	0.311953	22	0.302171
TaquSat9-90	90	56.7	0.000743442	27.15	0.368421	25	0.371467
TaquSat10-24	24	50	7.32797e-05	23.12	0	25	0.513793
TaquSat12-101	101	50.5	8.5658e-05	30.46	0	26	0.398844
TaquSat13-54	54	59.3	2.32712e-05	18.89	0	19	1
TaquSat14-17	17	35.3	1.80724e-05	16.89	0	16	1
Taqu_Tel-5	6	50	0.0620409	3.04	0.848907	0	0.515248
Total	10		0.0815462
Media	359.1	54.21	0.00815462	19.631	0.277444	19	0.564247
Mediana	69	54.05	0.000575592	22.07	0.248796	23	0.456318
SD	921.453	18.4288	0.0184427	10.934	0.297852	11.341	0.301051
Min	6	35.3	1.80724e-05	3.04	0	0	0.302171
Max	3102	66.7	0.0620409	30.46	0.848907	31	1

## Sheet: S. aquaticus
SatDNA Family	RUL	A-T%	Genome %	Kimura Divergence %	TSI	DivPeak	RSP
TaquSat2-107	107	55.1	0.0193296	34.32	0.185897	33	0.500848
TaquSat3-6	6	66.7	5.49125e-05	9.64	0	4	0.611314
TaquSat5-3102	3102	53	0.0110878	21.89	0.746535	22	0.504203	TaquSat5-3102	3102	53	0.0110878	21.89	0.746535	22	0.504203	TaquSat5-3102	3102	53	0.0110878	21.89	0.746535	22	0.504203	TaquSat5-3102	3102	53	0.0110878	21.89	0.746535	22	0.504203	TaquSat5-3102	3102	53	0.0110878	21.89	0.746535	22	0.504203	TaquSat5-3102	3102	53	0.0110878	21.89	0.746535	22	0.504203	TaquSat5-3102	3102
TaquSat6-84	84	65.5	0.0168447	25.14	0.456674	25	0.32676
TaquSat9-90	90	56.7	0.000882408	23.81	0.0655738	19	0.433342
TaquSat10-24	24	50	0.000166641	35.15	0.2	31	0.294084
TaquSat13-54	54	59.3	0.00084433	26.65	0	27	0.573182
Taqu_Tel-5	6	50	0.000206523	31.61	0.0555556	42	0.228571
Total	8		0.0494169
Media	434.125	57.0375	0.00617712	26.0262	0.213779	25.375	0.434038
Mediana	69	55.9	0.000863369	25.895	0.125736	26	0.467095
SD	1078.68	6.42894	0.00825165	8.23678	0.26246	11.1987	0.138093
Min	6	50	5.49125e-05	9.64	0	4	0.228571
Max	3102	66.7	0.0193296	35.15	0.746535	42	0.611314
[truncated: 5,000 more columns]

## Sheet: G. pyrenaicus
SatDNA Family	RUL	A-T%	Genome %	Kimura Divergence %	TSI	DivPeak	RSP
TaquSat2-107	107	55.1	0.00249114	30.24	0.240876	31	0.365381
TaquSat3-6	6	66.7	0.000344451	4.3	0.733333	0	0.536538
TaquSat5-3102	3102	53	0.000186633	16.19	0.5	15	0.305606
TaquSat6-84	84	65.5	0.0126354	25.12	0.503413	23	0.280764
TaquSat9-90	90	56.7	0.000767065	26.63	0.307692	24	0.594293
TaquSat10-24	24	50	8.0979e-05	36.97	0	30	0.437628
TaquSat11-71	71	40.3	3.37827e-05	33.34	0	37	0.646154
TaquSat14-17	17	35.3	1.97066e-05	20.83	0	20	1
Taqu_Tel-5	6	50	0.00146127	20.27	0.493333	0	0.176787
Total	9		0.0180204
Media	389.667	52.5111	0.00200227	23.7656	0.308739	20	0.482572
Mediana	71	53	0.000344451	25.12	0.307692	23	0.437628
SD	967.533	19.2473	0.00389116	11.9417	0.271863	13.8243	0.279041
Min	6	35.3	1.97066e-05	4.3	0	0	0.176787
Max	3102	66.7	0.0126354	36.97	0.733333	37	1

## Sheet: U. gracilis
SatDNA Family	RUL	A-T%	Genome %	Kimura Divergence %	TSI	DivPeak	RSP
TaquSat2-107	107	55.1	0.000143791	24.73	0.428571	24	0.380675
TaquSat3-6	6	66.7	0.000336179	7.02	0.0322581	3	0.428493
TaquSat5-3102	3102	53	0.000185074	28.8	0.666667	32	0.432127
TaquSat6-84	84	65.5	0.0277522	27.09	0.413389	24	0.297608
TaquSat9-90	90	56.7	2.78563e-05	34.27	0	34	1
TaquSat10-24	24	50	7.11437e-05	42.01	0	44	0.364892
Taqu_Tel-5	6	50	0.00477875	26.55	0.65368	26	0.379043
Total	7		0.033295
Media	488.429	56.7143	0.00475642	27.21	0.313509	26.7143	0.468977
Mediana	84	55.1	0.000185074	27.09	0.413389	26	0.380675
SD	1153.24	6.87348	0.0102861	10.6899	0.299814	12.6322	0.238421
Min	6	50	2.78563e-05	7.02	0	3	0.297608
Max	3102	66.7	0.0277522	42.01	0.666667	44	1
